# Supplementary material
Source: MDPI journal article supplement (https://www.mdpi.com/2076-3298/8/4/36)
Supplement: s1 [file s1]

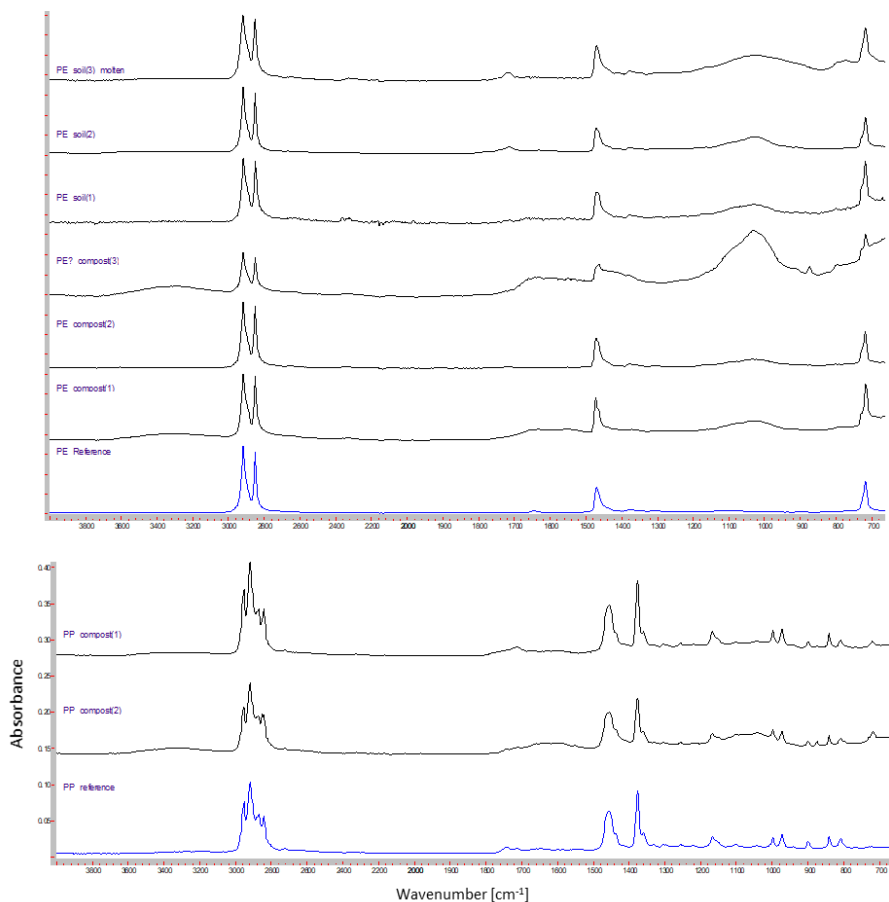

**Figure S1.** FTIR analysis of 8 tested particles from composts and Dutch soils. Particles from the soil were without exception classified as polyethylene (PE), with one particle seemingly polluted by other material. Two particles from compost were classified as polypropylene (PP), confirming the presence of multiple types of light density MPs in the material.
